# Supplementary material for: Handgrip Strength Correlated with Falling Risk in Patients with Degenerative Cervical Myelopathy
Source: MDPI journal article supplement (doi:10.3390/jcm10091980), 2021-05-05
Supplement: s1 [file s1]

**Table S1.** Pearson correlation analysis of HGS.

|        |             | Preoperative           |        |        |       |            |            |                     |               |        |        |        |       |        |
|--------|-------------|------------------------|--------|--------|-------|------------|------------|---------------------|---------------|--------|--------|--------|-------|--------|
|        |             | Cord signal            | age    | Fall   | NDI   | mJOA score | mJOA grade | Fried               | Frailty model | EQ-VAS | AST    | SMT    | STS   | TUGT   |
| All    | Coefficient |                        | -0.41  | -0.32  | -0.38 |            |            |                     |               |        | -0.50  | -0.42  | -0.44 |        |
|        | (r)         | 0.147                  | 9      | 0      | 3     | 0.400      | -0.301     |                     | 0.693         | 0.227  | 2      | 3      | 8     | -0.526 |
|        | p-value     | 0.036                  | 0.0000 | 0.0000 | 0.000 | 0.000      | 0.001      |                     | 0.000         | 0.001  | 0.0000 | 0.0000 | 0.000 | 0.000  |
| Male   | Coefficient |                        | -0.30  | -0.36  | -0.20 |            |            |                     |               |        | -0.32  | -0.35  | -0.42 |        |
|        | (r)         | NS                     | 4      | 7      | 5     | 0.372      | -0.283     |                     | 0.289         | 0.267  | 8      | 9      | 3     | -0.218 |
|        | p-value     | NS                     | 0.0020 | 0.0000 | 0.043 | 0.000      | 0.000      |                     | 0.004         | 0.008  | 0.0010 | 0.0000 | 0.000 | 0.031  |
| Female | Coefficient |                        | -0.27  | -0.36  | -0.43 |            |            |                     |               |        | -0.28  | -0.36  | -0.33 |        |
|        | (r)         | -0.538                 | 7      | 7      | 6     | 0.608      | -0.318     |                     | 0.798         | 0.549  | 7      | 4      | 5     | -0.674 |
|        | p-value     | 0.000                  | 0.0040 | 0.0000 | 0.000 | 0.000      | 0.000      |                     | 0.000         | 0.000  | 0.0040 | 0.0000 | 0.001 | 0.000  |
|        |             | Postoperative 3 months |        |        |       |            |            |                     |               |        |        |        |       |        |
|        |             | Cord signal            | Age    | Fall   | NDI   | mJOA score | mJOA grade | Frailty-Fried model | EQ-VAS        | AST    | SMT    | STS    | TUGT  |        |
| All    | Coefficient |                        | -0.47  | -0.24  | -0.14 |            |            |                     |               |        | -0.35  | -0.36  | -0.41 |        |
|        | (r)         | NS                     | 4      | 0      | 9     | 0.390      | -0.408     |                     | 0.539         | 0.203  | 0      | 4      | 9     | -0.297 |
|        | p-value     | NS                     | 0.0000 | 0.0010 | 0.034 | 0.000      | 0.000      |                     | 0.000         | 0.040  | 0.0000 | 0.0000 | 0.000 | 0.000  |
| Male   | Coefficient |                        | -0.30  |        | -0.18 |            |            |                     |               |        | -0.62  | -0.42  |       |        |
|        | (r)         | NS                     | 8      | NS     | 3     | 0.394      | -0.435     |                     | NS            | NS     | NS     | 9      | 8     |        |
|        | p-value     | NS                     | 0.002  | NS     | 0.071 | 0.000      | 0.000      |                     | NS            | NS     | NS     | 0.0000 | 0.000 |        |
| Female | Coefficient |                        | -0.42  |        | -0.21 |            |            |                     |               |        | -0.50  |        |       |        |
|        | (r)         | -0.553                 | 7      | NS     | 6     | 0.321      | -0.306     |                     | 0.429         | NS     | 5      | NS     | NS    | NS     |
|        | p-value     | 0.000                  | 0.000  | NS     | 0.027 | 0.001      | 0.001      |                     | 0.000         | NS     | 0.000  | NS     | NS    | NS     |
|        |             | Postoperative 1 year   |        |        |       |            |            |                     |               |        |        |        |       |        |
|        |             | Cord signal            | age    | Fall   | NDI   | mJOA score | mJOA grade | Frailty-Fried model | EQ-VAS        | AST    | SMT    | STS    | TUGT  |        |
| ALL    | Coefficient |                        | -0.41  | -0.36  | -0.18 |            |            |                     |               |        | -0.55  | -0.66  | -0.61 |        |
|        | (r)         | 0.693                  | 7      | 3      | 2     | 0.577      | -0.713     |                     | 0.385         | 0.194  | 3      | 5      | 7     | -0.573 |
|        | p-value     | 0.000                  | 0.0000 | 0.0000 | 0.045 | 0.000      | 0.000      |                     | 0.000         | 0.041  | 0.0000 | 0.0000 | 0.000 | 0.000  |
| Male   | Coefficient |                        |        |        | -0.31 |            |            |                     |               |        | -0.87  | -0.89  | -0.88 |        |
|        | (r)         | 0.443                  | NS     | NS     | 3     | 0.300      | -0.569     |                     | NS            | 0.426  | 9      | 1      | 5     | -0.670 |
|        | p-value     | 0.000                  | NS     | NS     | 0.013 | 0.017      | 0.000      |                     | NS            | 0.000  | 0.0000 | 0.0000 | 0.000 | 0.000  |
| Female | Coefficient |                        | -0.51  |        |       |            |            |                     |               |        | -0.68  | -0.67  | -0.60 |        |
|        | (r)         | NS                     | 6      | NS     | NS    | 0.632      | -0.508     |                     | NS            | NS     | 2      | 9      | 8     | -0.327 |
|        | p-value     | NS                     | 0.000  | NS     | NS    | 0.000      | 0.000      |                     | NS            | NS     | 0.0000 | 0.0000 | 0.000 | 0.050  |
